# Supplementary material for: The deubiquitinase Usp9x regulates PRC2-mediated chromatin reprogramming during mouse development
Source: PubMed Central journal article supplement (PMC7994559; doi:10.1038/s41467-021-21910-0), 2021-03-25
Supplement: 41467_2021_21910_MOESM3_ESM.pdf [file 41467_2021_21910_MOESM3_ESM.pdf]

## Description of Additional Supplementary Files

**Supplementary Data 1:** RNA-seq results from ES cells. Toplevel analyses of Usp9x-high and Usp9x-low ES cells after 8h auxin treatment or following 48h washout in serum/LIF. See Fig. 1 and Supplementary Figs. 1-2.

**Supplementary Data 2:** RNA-seq results from E8.5 embryos. Toplevel analyses of Usp9x-mutant versus control embryos dissected at E8.5. Significant genes are defined as  $p_{adj} < 0.1$ . See Fig. 2 and Supplementary Fig. 3.

**Supplementary Data 3:** Oligonucleotide sequences. Primer sequences used for cloning, qRT-PCR and mouse genotyping.
